# Supplementary material for: Species redistribution, not adaptation, drives butterfly responses to climate change
Source: Research Square preprint supplement (doi:10.21203/rs.3.rs-8232273/v1), 2026-01-23
Supplement: Supplementary file 1 [file e19324bfb96a3205efda41e3.pdf]

# Species redistribution, not adaptation, drives butterfly responses to climate change

## Supplementary Materials

Table S1: The same sites ordered by elevation, with coordinates (latitude and longitude) given.

| Site | Latitude      | Longitude     | Elevation (m) |
|------|---------------|---------------|---------------|
| 1    | 47°35'24.94"N | 12°50'7.33"E  | 820           |
| 2    | 47°34'39.57"N | 12°48'34.07"E | 940           |
| 3    | 47°35'22.95"N | 12°53'34.87"E | 1044          |
| 4    | 47°34'40.31"N | 12°57'16.74"E | 1105          |
| 5    | 47°34'33.98"N | 13° 0'38.95"E | 1306          |
| 6    | 47°33'13.16"N | 13° 0'44.39"E | 1461          |
| 7    | 47°31'32.60"N | 13° 0'10.91"E | 1553          |
| 8    | 47°32'13.72"N | 12°59'42.88"E | 1683          |
| 9    | 47°33'21.62"N | 13° 1'52.47"E | 1825          |

### Supplementary Results 1

There was a significant difference in ramp rate across runs ( $\chi^2 = 35.3$ , D.F. = 59,  $P < 0.001$ ), however the achieved ramp rates differed at most by 0.11°C per minute. Ramp rate did not have a significant effect on the CTmax values ( $p = 0.195$ ).

Table S2: The list of species (in alphabetical order), along with their sample size across all sites, the species-mean wing length, species-level colouration value (NIR reflectance in the basal portion of the wing, either dorsal for dorsal baskers and ventral for lateral baskers), the thermoregulation capacity (slope of body temperature and air temperature, inverted so that a high value indicates a better thermoregulation capacity (more stable slope)), and CTmax (LT50 (lethal temperature 50), the temperature at which 50% of individuals had fallen).

| Species                 | Sample size | Mean wing length (cm) | Colouration (NIR reflectance) | Thermoregulation (inverted slope) | CTmax (LT50) |
|-------------------------|-------------|-----------------------|-------------------------------|-----------------------------------|--------------|
| <i>Aglais io</i>        | 23          | 2.83                  | 22.64                         | 0.94                              | 45.57        |
| <i>Araschnia levana</i> | 7           | 2.00                  | 47.53                         | 0.29                              | NA           |
| <i>Argynnis adippe</i>  | 5           | 2.88                  | 46.11                         | 0.46                              | NA           |
| <i>Argynnis aglaja</i>  | 8           | 2.96                  | 40.77                         | -0.01                             | NA           |
| <i>Argynnis paphia</i>  | 27          | 3.40                  | 43.31                         | 0.28                              | 45.29        |
| <i>Aricia agestis</i>   | 1           | 1.39                  | 46.78                         | NA                                | NA           |
| <i>Boloria dia</i>      | 1           | 2.32                  | 48.65                         | NA                                | NA           |

|                         |     |      |       |       |       |
|-------------------------|-----|------|-------|-------|-------|
| <i>Boloria titania</i>  | 1   | 2.54 | 37.18 | NA    | NA    |
| <i>Colias</i>           |     |      |       |       |       |
| <i>alfacariensis</i>    | 1   | 2.50 | 93.78 | NA    | NA    |
| <i>Colias crocea</i>    | 4   | 2.52 | 89.20 | 0.27  | NA    |
| <i>Colias hyale</i>     | 2   | 2.48 | 88.42 | NA    | NA    |
| <i>Colias</i>           |     |      |       |       |       |
| <i>phicomone</i>        | 2   | 2.71 | 76.61 | NA    | NA    |
| <i>Erebia aethiops</i>  | 169 | 2.37 | 37.72 | 0.24  | 44.33 |
| <i>Erebia ligea</i>     | 20  | 2.43 | 32.33 | 0.12  | 44.69 |
| <i>Erebia manto</i>     | 26  | 2.10 | 18.13 | 0.07  | 45.83 |
| <i>Erebia</i>           |     |      |       |       |       |
| <i>melampus</i>         | 11  | 1.96 | 20.13 | 0.16  | 44.60 |
| <i>Erebia meolans</i>   | 1   | 2.46 | 20.09 | NA    | NA    |
| <i>Erebia pronoe</i>    | 54  | 2.27 | 42.09 | 0.28  | 46.48 |
| <i>Gonepteryx</i>       |     |      |       |       |       |
| <i>ramni</i>            | 4   | 2.91 | 99.74 | -0.62 | NA    |
| <i>Hesperia</i>         |     |      |       |       |       |
| <i>comma</i>            | 61  | 1.44 | 34.14 | 0.22  | 46.46 |
| <i>Leptidea sinapis</i> | 1   | 2.06 | 92.13 | NA    | NA    |
| <i>Lycaena</i>          |     |      |       |       |       |
| <i>virgaureae</i>       | 7   | 1.67 | 34.15 | 0.53  | 46.78 |
| <i>Maniola jurtina</i>  | 18  | 2.25 | 37.08 | 0.44  | 45.00 |
| <i>Melitaea athalia</i> | 1   | 2.01 | 30.50 | NA    | NA    |
| <i>Papilio</i>          |     |      |       |       |       |
| <i>machaon</i>          | 1   | 3.74 | 20.62 | NA    | NA    |
| <i>Parnassius</i>       |     |      |       |       |       |
| <i>apollo</i>           | 1   | 3.96 | 37.05 | NA    | NA    |
| <i>Pieris mannii</i>    | 1   | 2.65 | 59.47 | NA    | NA    |
| <i>Pieris napi</i>      | 30  | 2.48 | 39.35 | 0.24  | 43.54 |
| <i>Pieris rapae</i>     | 14  | 2.40 | 64.23 | 0.49  | NA    |
| <i>Polyommatus</i>      |     |      |       |       |       |
| <i>bellargus</i>        | 2   | 1.60 | 19.69 | NA    | NA    |
| <i>Polyommatus</i>      |     |      |       |       |       |
| <i>coridon</i>          | 36  | 1.71 | 16.84 | 0.22  | 46.62 |
| <i>Polyommatus</i>      |     |      |       |       |       |
| <i>icarus</i>           | 11  | 1.50 | 24.58 | 0.25  | 44.07 |
| <i>Polyommatus</i>      |     |      |       |       |       |
| <i>thersites</i>        | 2   | 1.33 | 25.07 | 0.29  | NA    |
| <i>Pyrgus malvae</i>    | 2   | 1.48 | 27.59 | NA    | NA    |
| <i>Thymelicus</i>       |     |      |       |       |       |
| <i>sylvestris</i>       | 11  | 1.43 | 33.43 | 0.08  | NA    |
| <i>Vanessa cardui</i>   | 2   | 3.10 | 29.83 | NA    | NA    |

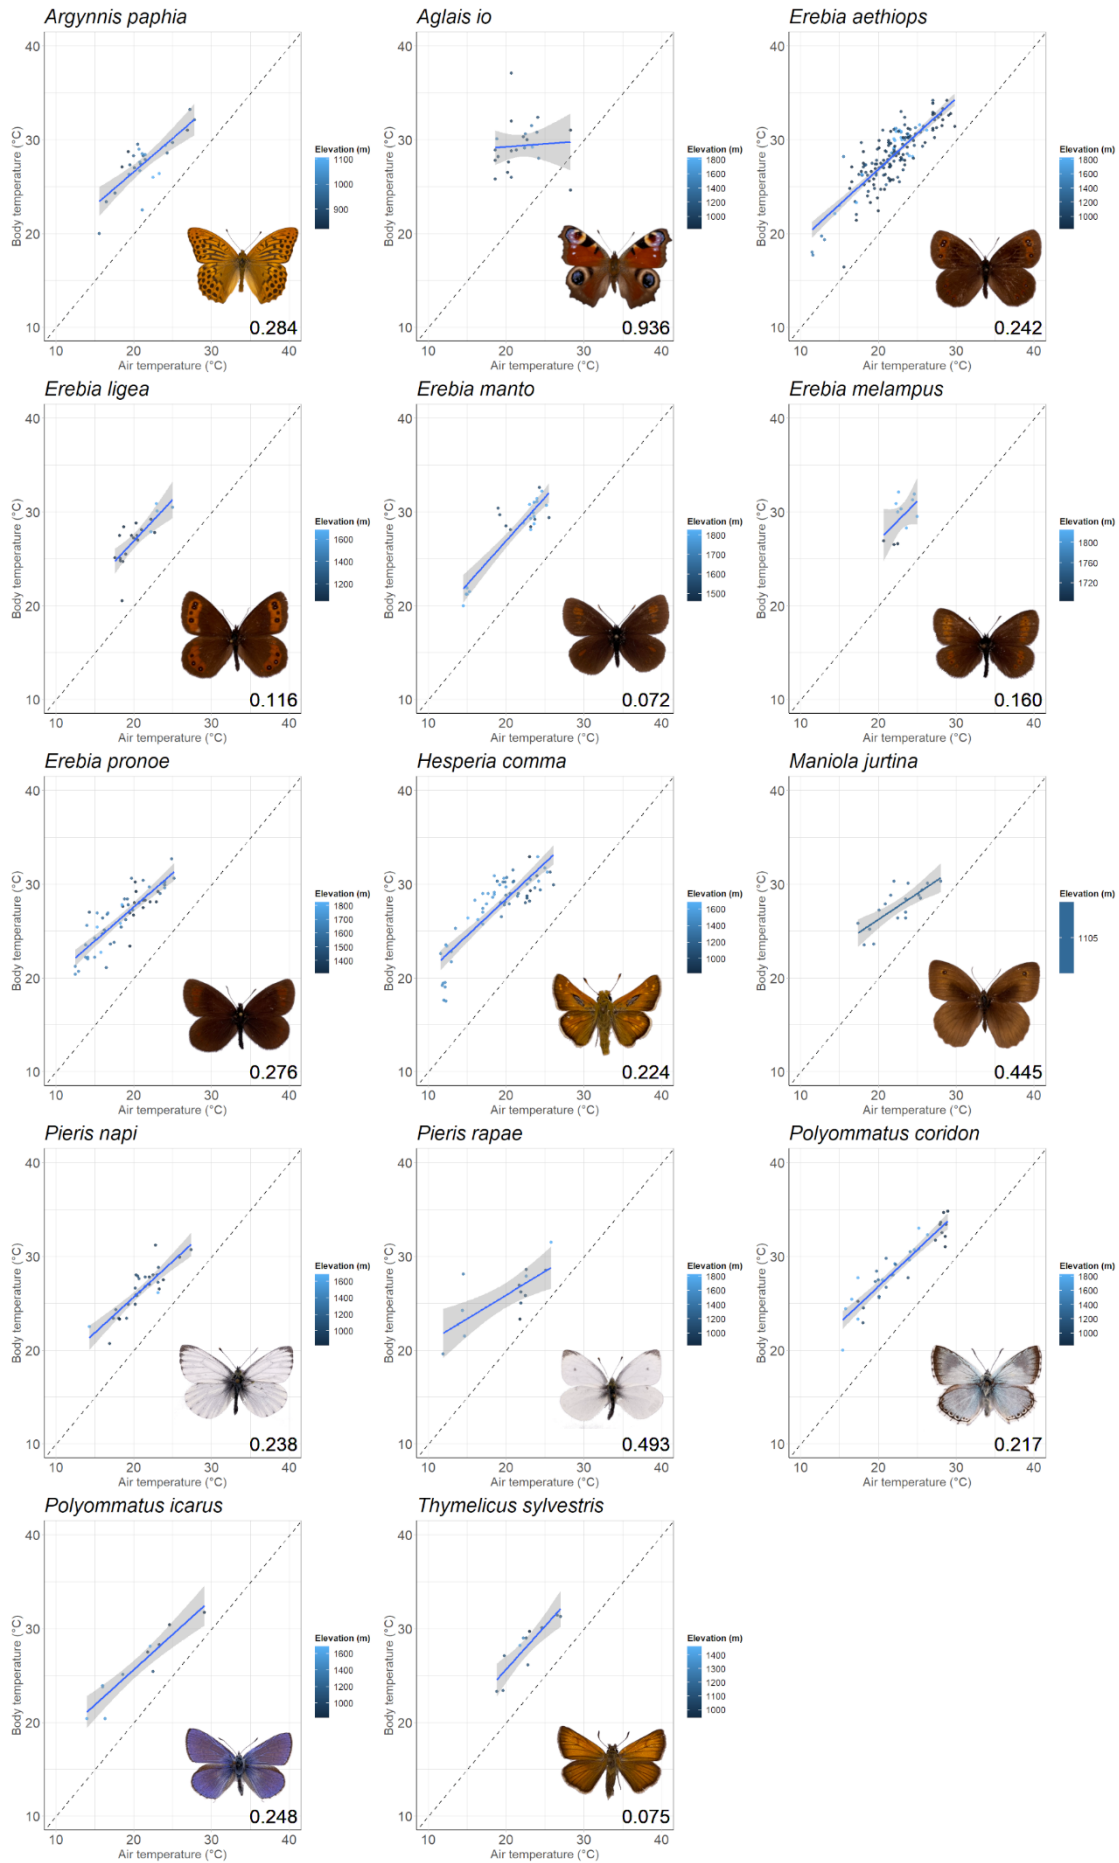

Figure S1: The relationship between body temperature and air temperature for all species with over 10 records, plotted separately (ordered alphabetically). Points represent individual butterflies, coloured by the elevation at which they were caught. Lines represent predicted responses, with shaded ribbons indicating 95% confidence intervals. Note that all axes have been standardised to ease comparisons. The slope values are given per plot to ease interpretation (inverted so that a high value indicates a strong thermoregulatory performance (shallow slope) and a low value indicates a poor thermoregulatory performance). Photographs are given of pinned butterflies to demonstrate the species, note that all are males for consistency.

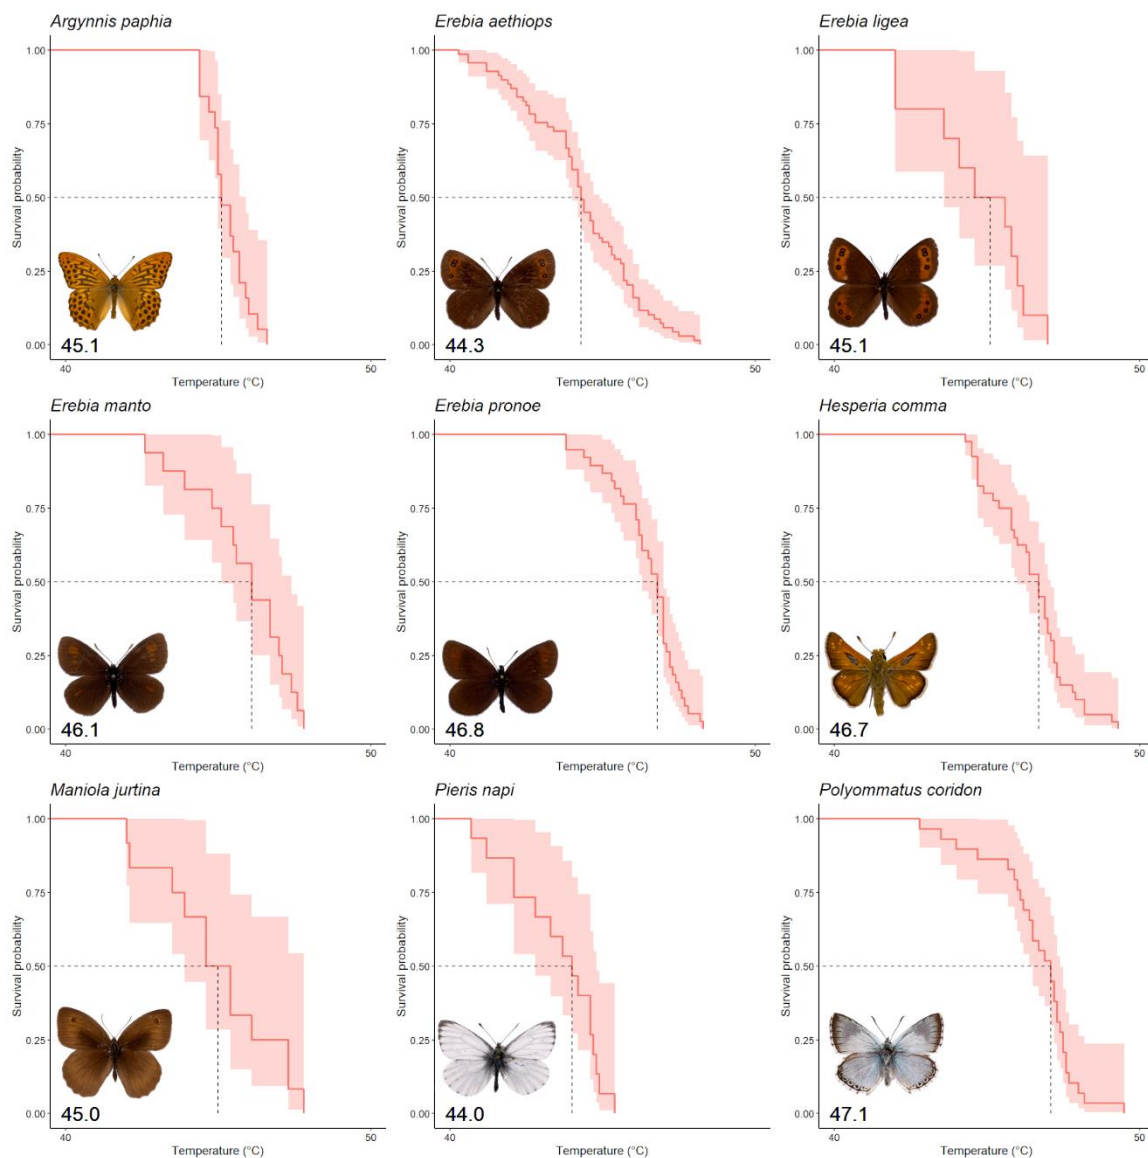

Figure S2: Survival curves for all species tested with at least 10 records, plotted separately by species (ordered alphabetically). The curves show the predicted survival probability, with coloured ribbons indicating 95% confidence intervals. Note that all axes have been standardised to ease comparisons. The dashed lines indicate the LT50 (lethal temperature 50) value for each species, the temperature at which 50% of individuals had fallen in the heat

knockdown assay. Values for the LT50 are also given per plot. Photographs are given of pinned butterflies to demonstrate the species, note that all are males for consistency.

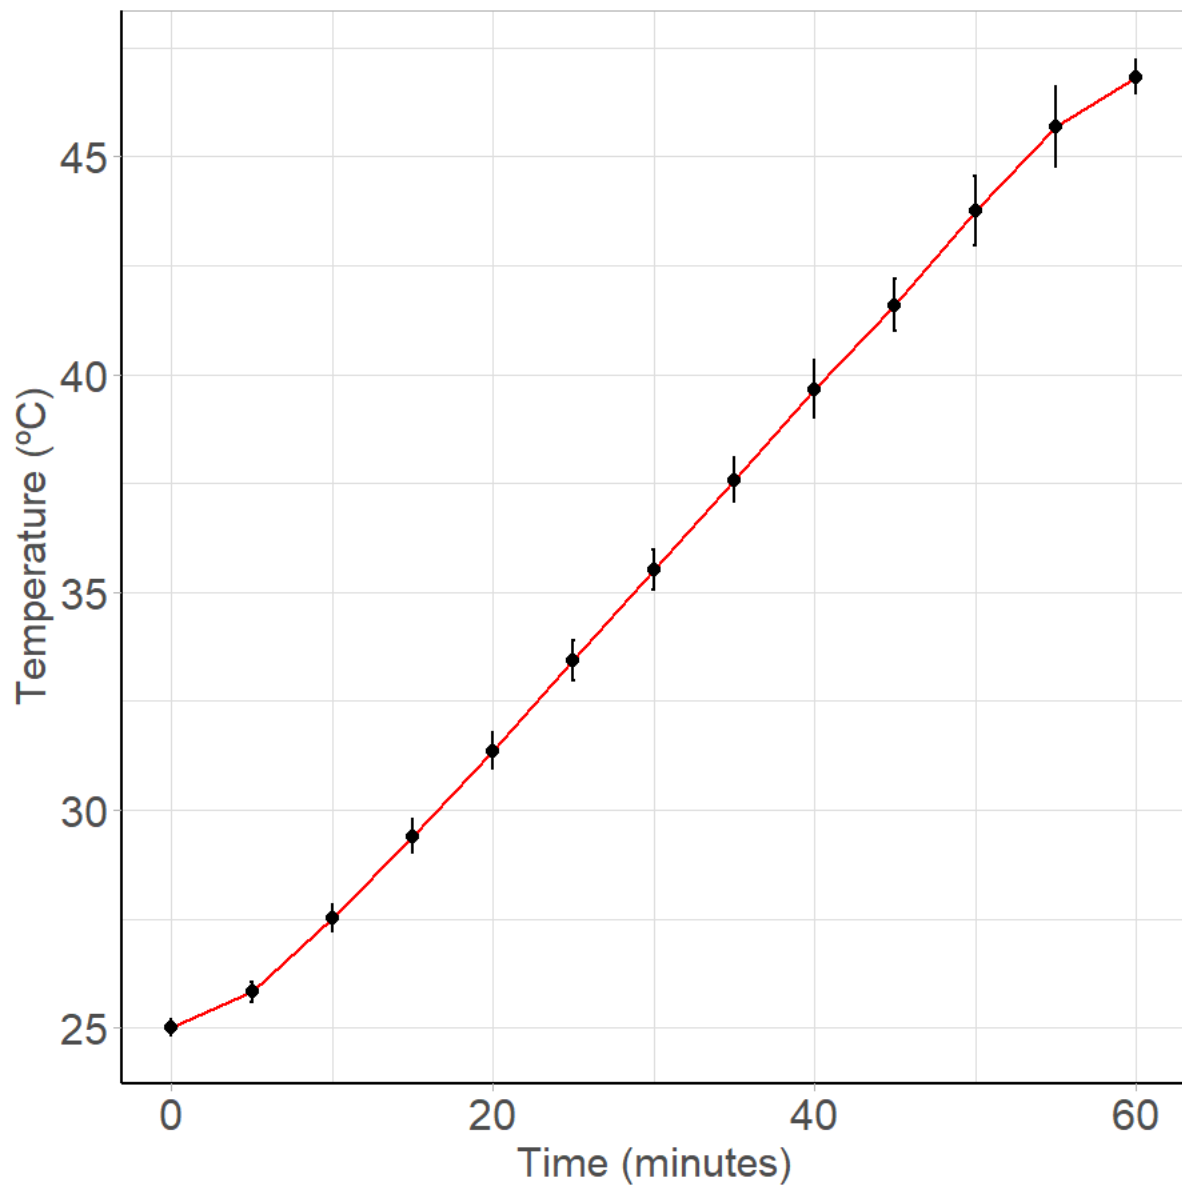

Figure S3: The achieved ramping rate of the water bath across all runs ( $n = 62$ ). Points represent mean temperatures at each five minute interval (from 0 to 60 minutes), error bars show standard deviation.

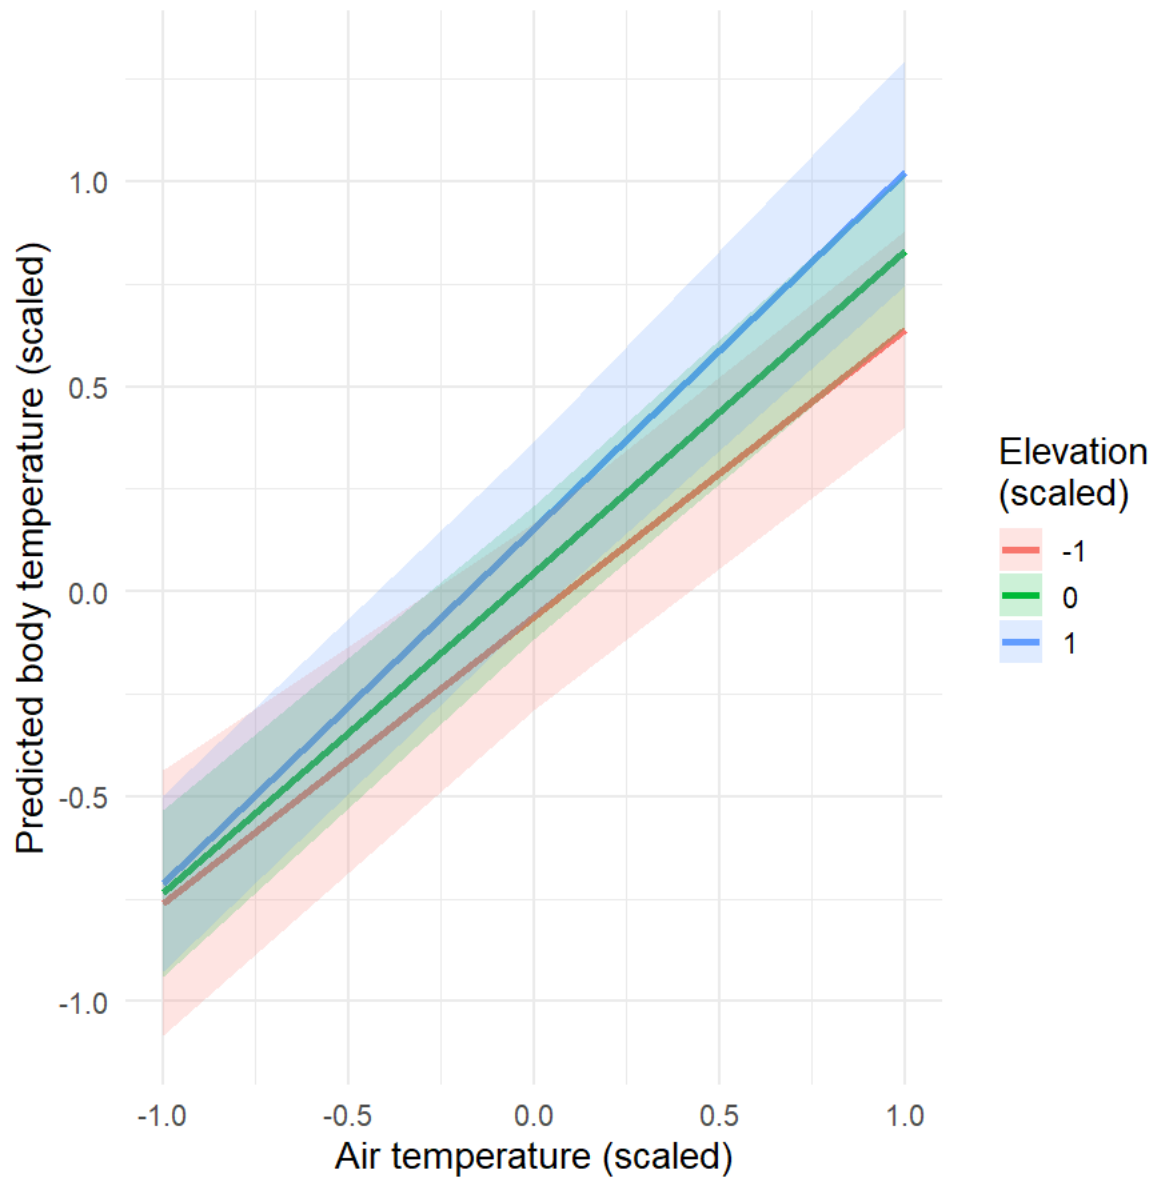

Figure S4: The relationship between predicted body temperature and air temperature split across the elevational gradient. Note that all variables have been scaled to ease interpretation, whereby -1 indicates low values and 1 indicates high values. The lines indicate predicted responses, the coloured ribbons indicate 95% confidence intervals.

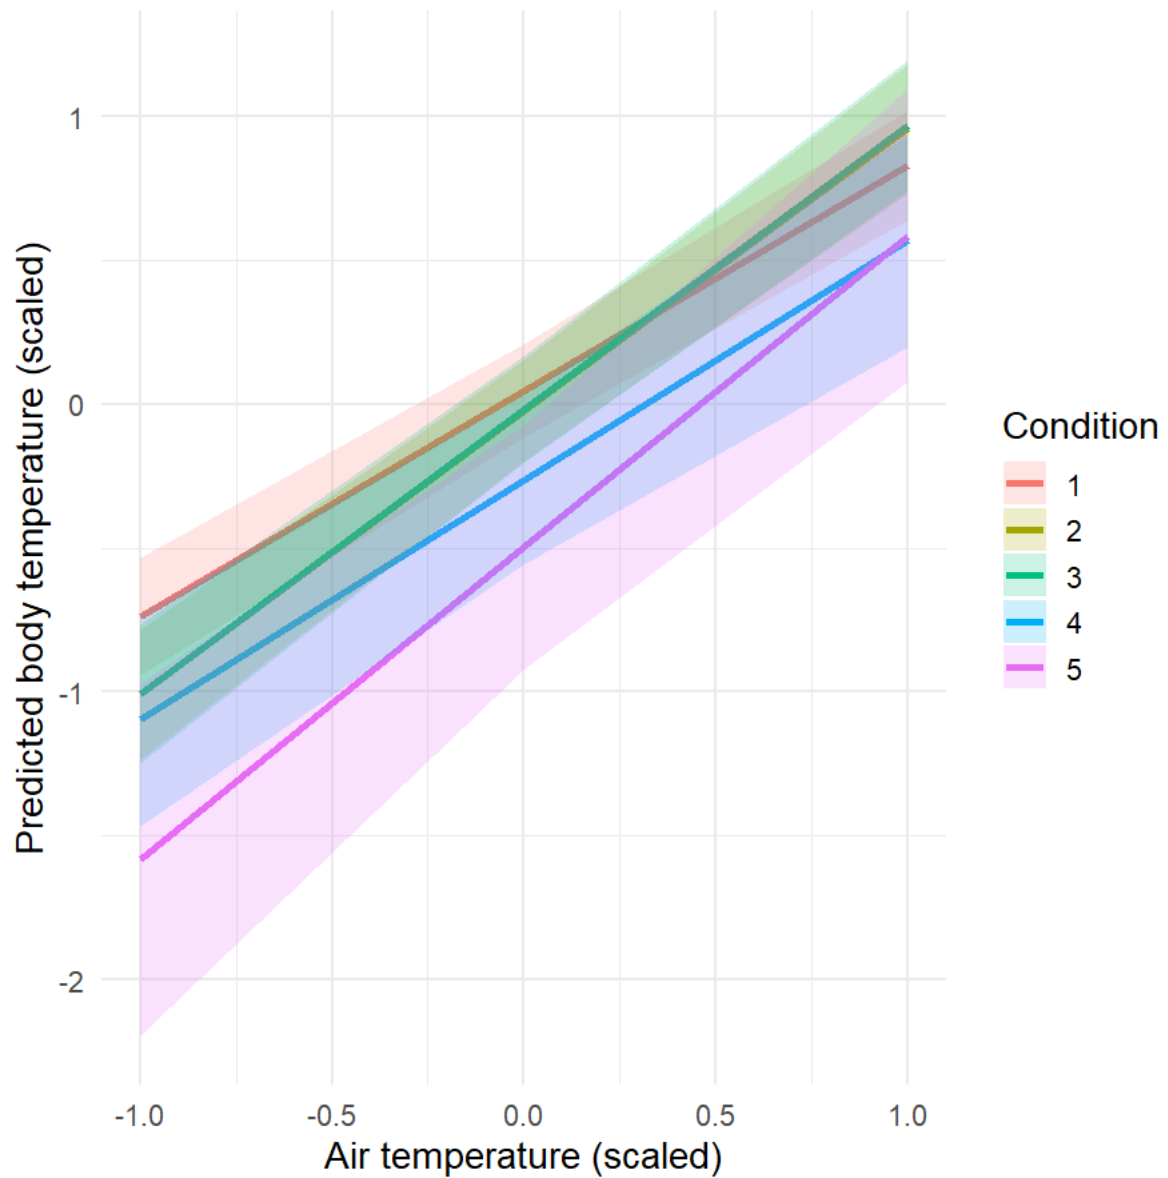

Figure S6: The relationship between predicted body temperature and air temperature across the elevational gradient, split by wing condition (whereby 1 indicates perfect condition with no scale loss, and 5 indicates substantial damage to the wings). Note that all numerical variables have been scaled to ease interpretation, whereby -1 indicates low values and 1 indicates high values. The lines indicate predicted responses, the coloured ribbons indicate 95% confidence intervals.

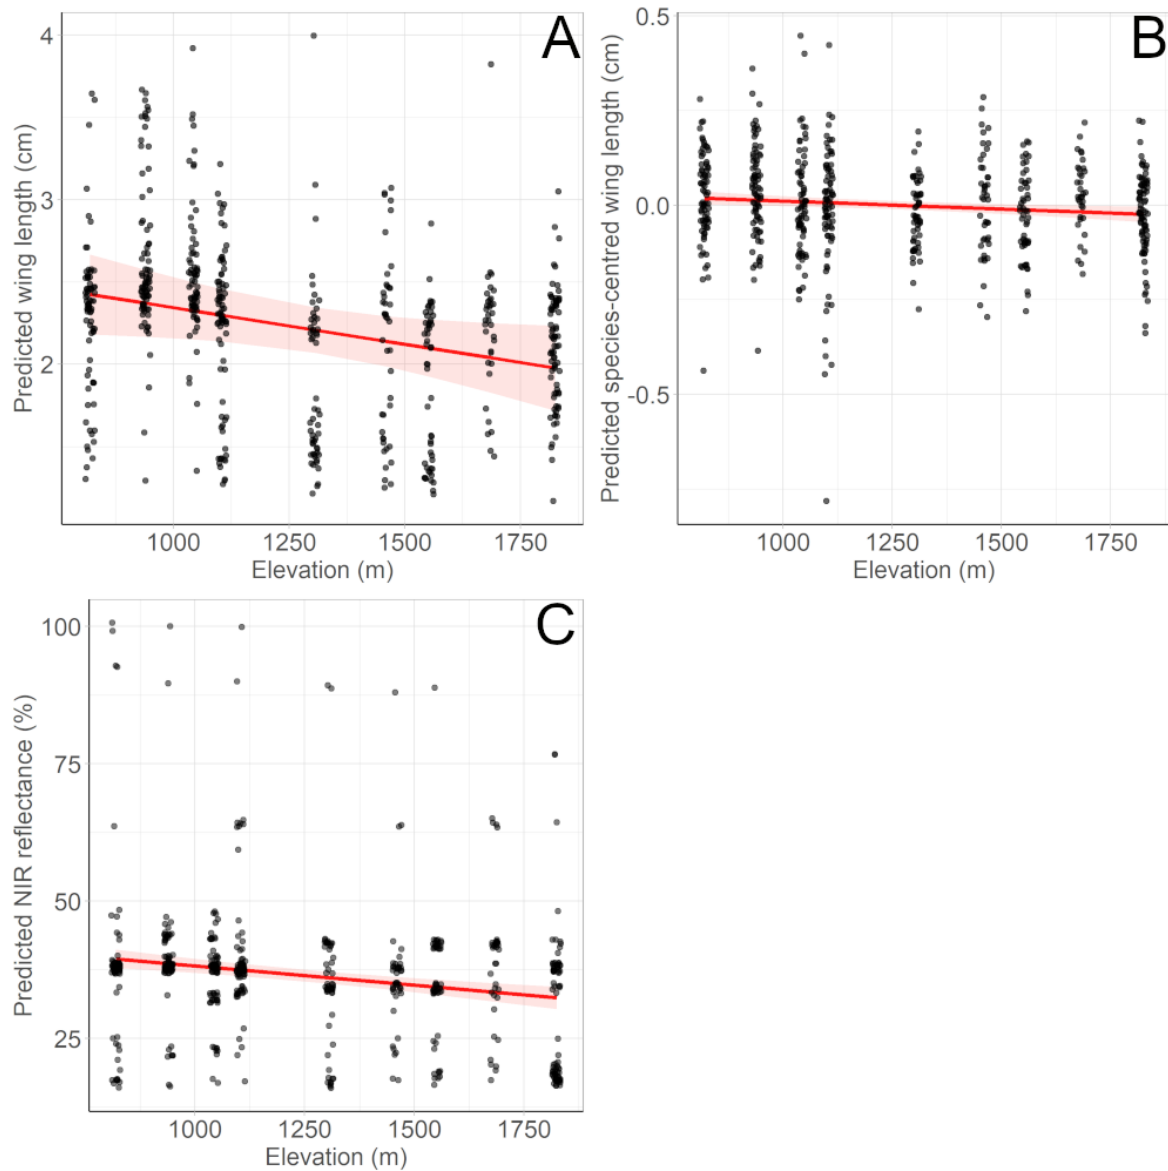

Figure S6: The change in (A) wing length, (B) species-centred wing length (where values above zero indicate an individual above average size for their species, and below zero indicates an individual below average size for their species), and (C) near-infrared (NIR) reflectance across the elevational gradient. The points represent individual butterflies and have been jittered to more clearly show overlapping points, the red line shows the predicted response. The coloured ribbons indicate 95% confidence intervals.
